# Supplementary material for: Chirality in Atomically Thin CdSe Nanoplatelets Capped with Thiol-Free Amino Acid Ligands: Circular Dichroism vs. Carboxylate Group Coordination
Source: Preprints.org preprint supplement (doi:10.20944/preprints202311.1841.v1), 2023-11-29
Supplement: Supplementary file 1 [file supplementary]

## Supporting Information:

### **Chirality in atomically thin CdSe nanoplatelets capped with thiol-free amino acid ligands: circular dichroism vs. carboxylate group coordination.**

*Daria A. Kurtina<sup>1</sup>, Vladimir B. Zaytsev<sup>2</sup>, Roman B. Vasiliev<sup>1, 3 \*</sup>*

<sup>1</sup> Department of Chemistry, Lomonosov Moscow State University, 119991, Moscow, Russia

<sup>2</sup> Department of Physics, Lomonosov Moscow State University, 119991, Moscow, Russia

<sup>3</sup> Department of Materials Science, Lomonosov Moscow State University, 119991, Moscow, Russia

## Contents

**Figure S1.** FTIR spectra of as-synthesized CdSe394OA and of intermediate exchanged CdSe394AcA.

**Figure S2.** Typical luminescence spectra of CdSe394OA NPLs and its modification after ligand exchange with L-Alanine (CdSe394Ala) and L-Phenylalanine (CdSe394Phe) ligands.

**Figure S3.** Photo of CdSe394Phe NPLs sample (a) under ambient light and (b) their luminescence under excitation of 370 nm.

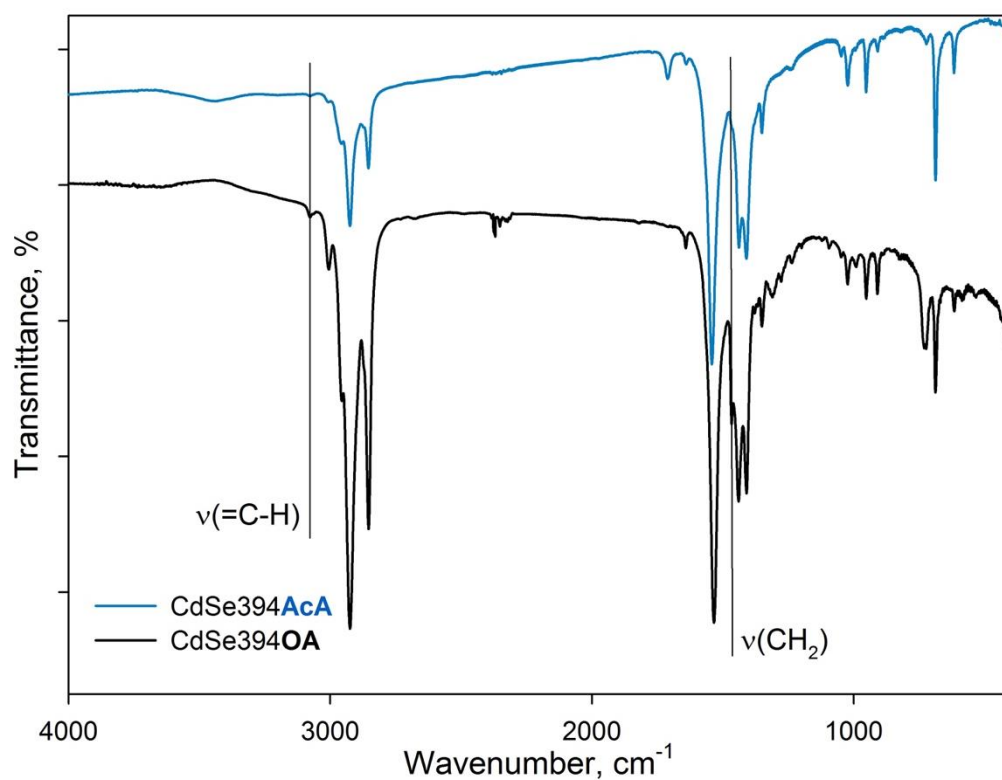

**Figure S1.** FTIR spectra of as-synthesized CdSe394OA (black solid line) and of intermediate exchanged CdSe394AcA (blue solid line).

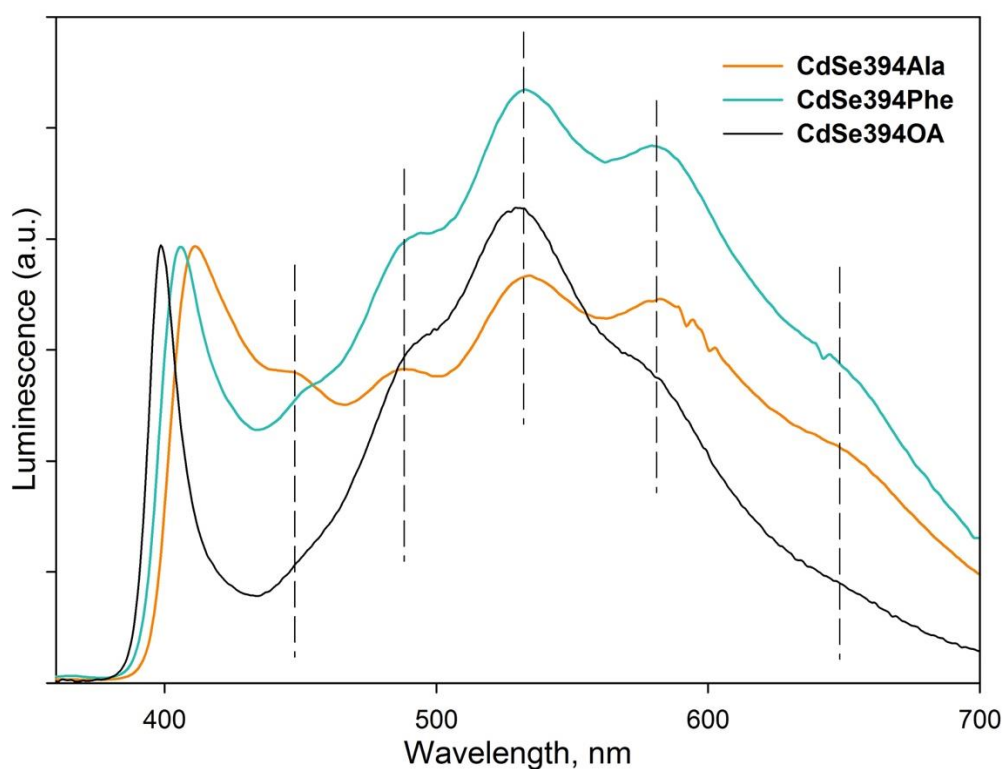

**Figure S2.** Typical luminescence spectra of CdSe394OA NPLs (black solid line) and its modification after ligand exchange with Ala (CdSe394Ala, orange solid line) and Phe (CdSe394Phe, turquoise solid line) ligands.

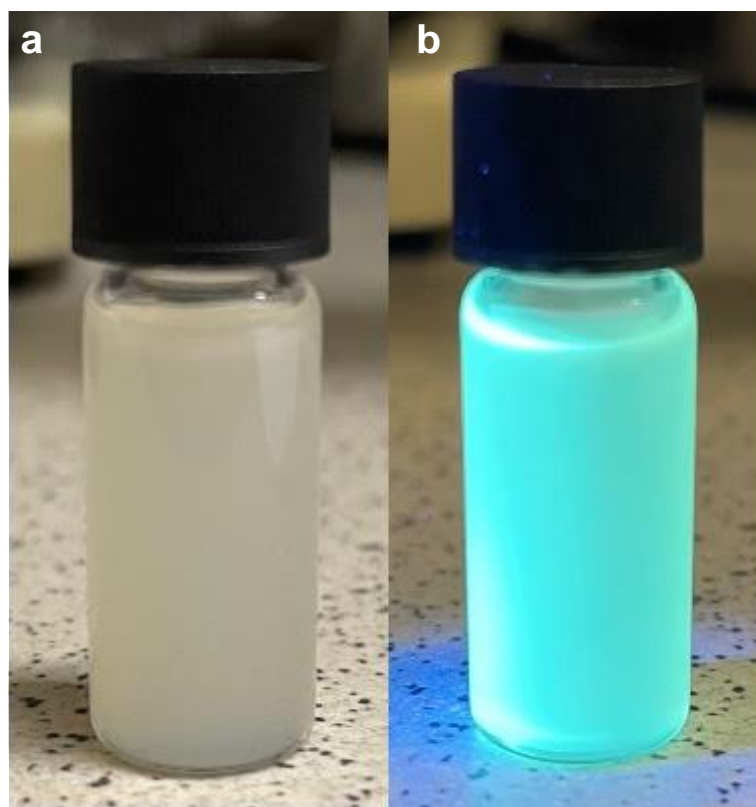

**Figure S3.** Photo of CdSe<sub>394</sub>Phe NPLs sample (a) under ambient light and (b) luminescent under excitation of 370 nm.
